# Supplementary material for: Learning from parental experience in a neonatal surgical unit: a qualitative service evaluation
Source: HighWire-hosted journal article supplement (doi:10.1136/wjps-2023-000596), 2023-07-01
Supplement: wjps-2023-000596supp002_data_supplement.pdf [file wjps-2023-000596supp002_data_supplement.pdf]

| Question                                                                                                                                             | Domain                                                       |
|------------------------------------------------------------------------------------------------------------------------------------------------------|--------------------------------------------------------------|
| <b>Thinking about when you were pregnant and when your baby was first born</b>                                                                       |                                                              |
| What were your main worries about the thought of coming into hospital?                                                                               | General anticipatory worries (including effect of COVID-19)  |
| <i>Were you worried about the pandemic, or did the pandemic have any other affect?</i>                                                               |                                                              |
| Did you know what to expect for you and your baby's care once your baby was born?                                                                    | Expectations of newborn care (including effect of COVID-19)  |
| <i>Did you think that the pandemic might have an effect?</i>                                                                                         |                                                              |
| Did you know who the team looking after your baby were?                                                                                              | Knowledge of team                                            |
| <i>Did you know which consultant neonatologist and which consultant surgeon was in charge of your baby's care, and how the 2 link?</i>               |                                                              |
| Were you made to feel welcomed by the team looking after your baby?                                                                                  | Feeling welcomed                                             |
| <i>Did you feel that they were approachable?</i>                                                                                                     |                                                              |
| <b>Thinking about the neonatal unit</b>                                                                                                              |                                                              |
| What are your thoughts on the room(s) where your baby was?                                                                                           | Parental view: room                                          |
| What do you think about your privacy while on the ward?                                                                                              | Parental view: privacy (including effect of COVID-19)        |
| <i>Do you think the pandemic affected your privacy?</i>                                                                                              |                                                              |
| Do you have any other comments regarding practical things that made a difference to you? For example, the parents' accommodation, refreshment areas, | Parental view: practicalities (including effect of COVID-19) |

|                                                                                                                                                                                          |                                                                                |
|------------------------------------------------------------------------------------------------------------------------------------------------------------------------------------------|--------------------------------------------------------------------------------|
| anything to do with your ability to travel to and from the hospital to visit or parking?                                                                                                 |                                                                                |
| <i>Did you notice any effects on these that might have been caused by the pandemic?</i>                                                                                                  |                                                                                |
| Is there anything else about practicalities of being on a neonatal unit we should have asked you?                                                                                        |                                                                                |
| <b>Considering the information and support you received</b>                                                                                                                              |                                                                                |
| For your personal circumstance did you need additional help (for example an interpreter) and was this provided for you?                                                                  | Presence of additional help (if needed)                                        |
| Did you understand your baby's diagnosis and treatment as much as you would have liked?                                                                                                  | Understanding /ability to talk to team                                         |
| <i>Were you able to talk to nursing staff and the doctors as much as you wanted?</i>                                                                                                     |                                                                                |
| How do you feel about the amount of information you were given?                                                                                                                          | Information amount                                                             |
| <i>Too much? Too little?</i>                                                                                                                                                             |                                                                                |
| Were you ever given conflicting information?                                                                                                                                             | Presence of conflicting information                                            |
| Were you aware of how to access emotional and practical support for you before, during or after your baby's admission? Was there anyone who was a 'constant' person all the way through? | Access to emotional/practical support:<br>Before – During – After; consistency |
| Is there anything you would have liked to have known that wasn't in the information given to you?                                                                                        | Unmet information needs                                                        |
| Do you think the pandemic affected the communication you received?                                                                                                                       | Information about COVID-19                                                     |
| Were the rules about COVID-19 easy to understand?                                                                                                                                        | Understanding of COVID-19 rules<br>(differences/changes/consistency?)          |
| <i>Were the rules always followed the same way by different staff members or families?</i><br><i>Did you notice differences between rooms?</i>                                           |                                                                                |

|                                                                                                                                                                           |                                                    |
|---------------------------------------------------------------------------------------------------------------------------------------------------------------------------|----------------------------------------------------|
| <i>What happened when rules weren't followed?</i>                                                                                                                         |                                                    |
| Do you recall the rules changing?                                                                                                                                         |                                                    |
| <i>If so, how soon did you get to know?</i>                                                                                                                               |                                                    |
| Did you feel confident that information about your baby's care was shared well between the members of the team, including nurses, doctors and everyone else in the team?  | Parental view: information was shared between team |
| <b>Thinking about COVID-19</b>                                                                                                                                            |                                                    |
| Did the pandemic changed how safe you felt for you and your baby?                                                                                                         | Feeling safe                                       |
| Do you think that the pandemic and its regulations influence how you and anyone else important for your baby (for example your partner) were able to bond with your baby? | Impact on bonding with baby                        |
| <i>Do you think that the pandemic affected this?</i>                                                                                                                      |                                                    |
| Do you have other children? Has having your baby in hospital affected them?                                                                                               | Impact on siblings                                 |
| <i>Do you think that the pandemic affected this?</i>                                                                                                                      |                                                    |
| Are there ways in which you think the pandemic might have affected the way that staff cared for your baby?                                                                | Parental view: impact on staff                     |
| Are there any other sources of stress that we have not asked about?                                                                                                       | Other sources of stress                            |
| <b>Leaving the unit</b>                                                                                                                                                   |                                                    |
| When you leave the neonatal unit, do you know if it will be to another ward, or to go home? How prepared do you/did you feel for discharge from the neonatal unit?        | Preparation for leaving unit                       |

|                                                                                                                                                               |                                |
|---------------------------------------------------------------------------------------------------------------------------------------------------------------|--------------------------------|
| Did someone make you aware of the support that is available to you for when you do get home, for example, coming to A&E, seeing your GP, support from family? | Awareness of support available |
| Do you have any particular concerns for your baby once they are at home, having had surgery?                                                                  | Concerns at home               |
| Are there any additional concerns or practical problems caused by the pandemic?                                                                               | Other concerns                 |

Supplementary Table 2. An example of a summary template from our analysis
